# Supplementary material for: Parent Questionnaires in Screening for Developmental Language Disorder Among Bilingual Children in Speech and Language Clinics
Source: Frontiers journal article supplement (doi:10.3389/feduc.2022.846111), 2022-06-13
Supplement: Data_Sheet_1.pdf [file Data_Sheet_1.pdf]

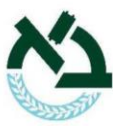

## Supplementary Material

### Appendix A: BIPAQ questionnaire

Date: \_\_\_\_\_

#### BIPAQ- Questionnaire for parents of bilingual children

**Dear Parents,**

The questionnaire you are about to fill out consists of questions concerning your child's language development process. Assessing a bilingual child linguistic performance requires more information than obtained by formal diagnosis, therefore, we ask you to **fill out all the questions** as it will help us assist your child in the most professional manner.

In the following questionnaire you will be asked to refer to your child's first language (HL) and your child's second language-Hebrew. Most of the questions are multiple choice ones but some require response in your own words. Please answer all the questions accurately, remember, no one knows your child better than you and we rely on your observations and point of view.

#### Section A: Demographic Information

1. Name of child: \_\_\_\_\_
2. Date of birth: \_\_\_\_\_ Age: Years \_\_\_\_\_, Months \_\_\_\_\_.
3. Country of birth: \_\_\_\_\_
4. Child's place in the birth order (if there is more than one child) 1 2 3 4 5 6
5. Brothers/Sisters:

| Birth Order | Name | Date of Birth | Age: (y:m) |
|-------------|------|---------------|------------|
|             |      |               |            |
|             |      |               |            |
|             |      |               |            |

6. (6.1) Name of Mother: \_\_\_\_\_ (6.2) Date of Birth: \_\_\_\_\_  
(6.3) Country of birth: \_\_\_\_\_ (6.4) Date of aliyah: \_\_\_\_\_
7. (7.1) Name of Father: \_\_\_\_\_ (7.2) Date of Birth: \_\_\_\_\_  
(7.3) Country of birth: \_\_\_\_\_ (7.4) Date of aliyah: \_\_\_\_\_

8. Interviewee: Mother/Father

9.

|                    | Mother (9.1-9.3) | Father (9.4-9.6) |
|--------------------|------------------|------------------|
| Occupation         |                  |                  |
| Current employment |                  |                  |
| Years of education |                  |                  |

10. Which languages do you use at work?

|        | Only HL | Mostly HL and a little SL | HL and SL equally | Mostly SL and a little HL | Only SL |
|--------|---------|---------------------------|-------------------|---------------------------|---------|
| Mother |         |                           |                   |                           |         |
| Father |         |                           |                   |                           |         |

\* HL = The first language the child acquired (usually mother tongue), SL = The second language acquired (usually Hebrew). If a third language is spoken please provide that information as well.



## Section B: Developmental Background Information

|    | Question                                                                                                                                                                                                                                                                                        | Answer                                                                 |  |
|----|-------------------------------------------------------------------------------------------------------------------------------------------------------------------------------------------------------------------------------------------------------------------------------------------------|------------------------------------------------------------------------|--|
| B1 | (11) At what age did your child begin to walk?                                                                                                                                                                                                                                                  | _____ months / years                                                   |  |
| B2 | (12.1) How old was your child when he/she spoke his/her first words?<br><br>(12.2) In which language did the child say his/her first words?<br><br>Examples of his/her first words. Please write them the way the child said them and translate if necessary ('baba' for 'bottle' for example). | _____ months / years<br><br>English / Hebrew / other<br>_____<br>_____ |  |
| B3 | How old was your child when he/she first put words together to make short sentences (for example "Daddy work," "more milk")?                                                                                                                                                                    | _____ months / years                                                   |  |
| B4 | At what age did the child begin to say longer sentences?                                                                                                                                                                                                                                        | Under 30 months    30-36 months    over 37 mo.                         |  |
| B5 | At what age did the child begin to express himself/herself freely?                                                                                                                                                                                                                              | Under 30 months    30-36 months    over 37 mo.                         |  |

B6. Do you feel that there is a difference between your child and other bilingual children in terms of his/her rate or process of language acquisition?

|                                   |                                      |                               |                                |
|-----------------------------------|--------------------------------------|-------------------------------|--------------------------------|
|                                   |                                      |                               |                                |
| Not as well as others his/her age | Almost as well as others his/her age | As well as others his/her age | Better than others his/her age |

B7. Do you have to repeat requests or questions to your child more often than with your other children?

|               |       |           |            |
|---------------|-------|-----------|------------|
|               |       |           |            |
| Almost always | Often | Sometimes | Not at all |

B8. Family history - In each cell, please indicate YES (=1) or NO (=0):

|                                                                                                         | Father | Mother | Brother/sister | Father's family | Mother's family |
|---------------------------------------------------------------------------------------------------------|--------|--------|----------------|-----------------|-----------------|
| Difficulties at school                                                                                  |        |        |                |                 |                 |
| Difficulties mainly with reading and spelling                                                           |        |        |                |                 |                 |
| Repeated one or more grades in school                                                                   |        |        |                |                 |                 |
| Difficulties understanding others when they speak                                                       |        |        |                |                 |                 |
| Difficulties expressing oneself orally (pronunciation, forming sentences, finding the right word, etc.) |        |        |                |                 |                 |



In sections 3 and 4 you will be asked to answer questions regarding your child's linguistic performance in reference to himself as well as other bilingual children.

### Section C: First Language Abilities

C1. How does your child express himself/herself in his/her first language?

|              |             |                  |                  |
|--------------|-------------|------------------|------------------|
|              |             |                  |                  |
| Single words | A few words | Simple sentences | Longer sentences |

C2. Compared to other children the same age, how do you think your child **expresses** him/herself in his first language?

|                                   |                                      |                               |                                |
|-----------------------------------|--------------------------------------|-------------------------------|--------------------------------|
|                                   |                                      |                               |                                |
| Not as well as others his/her age | Almost as well as others his/her age | As well as others his/her age | Better than others his/her age |

C3. How easy is it for family members and friends to have spontaneous conversations with your child?

|                |                    |                               |           |
|----------------|--------------------|-------------------------------|-----------|
|                |                    |                               |           |
| Very difficult | Slightly difficult | As well as others his/her age | Very easy |

C4. Compared to other children the same age, do you think your child has difficulties making correct sentences?

|                        |                   |          |                 |
|------------------------|-------------------|----------|-----------------|
|                        |                   |          |                 |
| Yes, many difficulties | Some difficulties | The same | No difficulties |

C5. Are you satisfied with your child's ability to comprehend in his/her first language?

|                      |               |           |                |
|----------------------|---------------|-----------|----------------|
|                      |               |           |                |
| Not at all satisfied | Not satisfied | Satisfied | Very satisfied |

C6. Are you satisfied with your child's ability to express in his/her first language?

|                      |               |           |                |
|----------------------|---------------|-----------|----------------|
|                      |               |           |                |
| Not at all satisfied | Not satisfied | Satisfied | Very satisfied |

C7. Does your child feel frustrated when he/she can't communicate in his/her first language?

|               |       |           |       |
|---------------|-------|-----------|-------|
|               |       |           |       |
| Almost always | Often | Sometimes | Never |



#### Section D: Second language Abilities- Hebrew

D1. Do you think your child has difficulties learning his/her second language- Hebrew? Yes No

D2. How does your child express himself/herself in Hebrew?

|              |             |                  |                  |
|--------------|-------------|------------------|------------------|
|              |             |                  |                  |
| Single words | A few words | Simple sentences | Longer sentences |

D3. Compared to other children the same age, how do you think your child **expresses** him/herself in Hebrew?

|                                          |                                      |                               |                                |
|------------------------------------------|--------------------------------------|-------------------------------|--------------------------------|
|                                          |                                      |                               |                                |
| Not at all as well as others his/her age | Almost as well as others his/her age | As well as others his/her age | Better than others his/her age |

D4. How easy is it for family members and friends to have spontaneous conversations in Hebrew with your child?

|                |                    |                               |           |
|----------------|--------------------|-------------------------------|-----------|
|                |                    |                               |           |
| Very difficult | Slightly difficult | As well as others his/her age | Very easy |

D5. Compared to other children the same age, do you think your child has difficulties making correct sentences in Hebrew?

|                        |                   |          |                 |
|------------------------|-------------------|----------|-----------------|
|                        |                   |          |                 |
| Yes, many difficulties | Some difficulties | The same | No difficulties |

D6. Are you satisfied with your child's ability to comprehend in Hebrew?

|                      |               |           |                |
|----------------------|---------------|-----------|----------------|
|                      |               |           |                |
| Not at all satisfied | Not satisfied | Satisfied | Very satisfied |

D7. Are you satisfied with your child's ability to express him/herself in Hebrew?

|                      |               |           |                |
|----------------------|---------------|-----------|----------------|
|                      |               |           |                |
| Not at all satisfied | Not satisfied | Satisfied | Very satisfied |

D8. Does your child feel frustrated when he/she can't communicate in Hebrew?

|               |       |           |       |
|---------------|-------|-----------|-------|
|               |       |           |       |
| Almost always | Often | Sometimes | Never |

#### Section E: Exposure to Languages

E1. How many years has your child been exposed to Hebrew? \_\_\_\_\_

- This section's results were not presented in this study, thus, will not be presented here.
