# Supplementary material for: Parent Questionnaires in Screening for Developmental Language Disorder Among Bilingual Children in Speech and Language Clinics
Source: Frontiers journal article supplement (doi:10.3389/feduc.2022.846111), 2022-06-13
Supplement: Data_Sheet_2.pdf [file Data_Sheet_2.pdf]

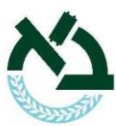

## Supplementary Material

### Appendix B: BIPAQ questionnaire Scoring System

Date: \_\_\_\_\_

#### BIPAQ- Questionnaire for parents of bilingual children

##### Section B: Developmental Background Information

|    | Question                                                                                                                                                                                                                                                                                        | Answer                                                                 | score                                                         |
|----|-------------------------------------------------------------------------------------------------------------------------------------------------------------------------------------------------------------------------------------------------------------------------------------------------|------------------------------------------------------------------------|---------------------------------------------------------------|
| B1 | (11) At what age did your child begin to walk?                                                                                                                                                                                                                                                  | _____ months / years                                                   | 0 = over 18 mon.<br>2 = under 18 months                       |
| B2 | (12.1) How old was your child when he/she spoke his/her first words?<br><br>(12.2) In which language did the child say his/her first words?<br><br>Examples of his/her first words. Please write them the way the child said them and translate if necessary ('baba' for 'bottle' for example). | _____ months / years<br><br>English / Hebrew / other<br>_____<br>_____ | 0 = over 25 months<br>1 = 16-24 months<br>2 = under 16 months |
| B3 | How old was your child when he/she first put words together to make short sentences (for example "Daddy work," "more milk")?                                                                                                                                                                    | _____ months / years                                                   | 0 = over 30 months<br>1 = 24-30 months<br>2 = under 24 months |
| B4 | At what age did the child begin to say longer sentences?                                                                                                                                                                                                                                        | Under 30 months    30-36 months    over 37 mo.                         | 0 = over 37 months<br>1 = 30-36 months<br>2 = under 30 months |
| B5 | At what age did the child begin to express himself/herself freely?                                                                                                                                                                                                                              | Under 30 months    30-36 months    over 37 mo.                         | 0 = over 37 months<br>1 = 30-36 months<br>2 = under 30 months |

B6. Do you feel that there is a difference between your child and other bilingual children in terms of his/her rate or process of language acquisition?

|                                   |                                      |                               |                                |
|-----------------------------------|--------------------------------------|-------------------------------|--------------------------------|
| 0                                 | 1                                    | 2                             | 3                              |
| Not as well as others his/her age | Almost as well as others his/her age | As well as others his/her age | Better than others his/her age |

B7. Do you have to repeat requests or questions to your child more often than with your other children?

|               |       |           |            |
|---------------|-------|-----------|------------|
| 0             | 1     | 2         | 3          |
| Almost always | Often | Sometimes | Not at all |



B8. Family history - In each cell, please indicate YES (=1) or NO (=0):

|                                                                                                                                                                                                  | Father | Mother | Brother/sister | Father's family | Mother's family |
|--------------------------------------------------------------------------------------------------------------------------------------------------------------------------------------------------|--------|--------|----------------|-----------------|-----------------|
| Difficulties at school                                                                                                                                                                           |        |        |                |                 |                 |
| Difficulties mainly with reading and spelling                                                                                                                                                    |        |        |                |                 |                 |
| Repeated one or more grades in school                                                                                                                                                            |        |        |                |                 |                 |
| Difficulties understanding others when they speak                                                                                                                                                |        |        |                |                 |                 |
| Difficulties expressing oneself orally (pronunciation, forming sentences, finding the right word, etc.)                                                                                          |        |        |                |                 |                 |
| 0 = if a member of immediate family had one of the mentioned difficulties<br>1 = if a member of extended family had one of the mentioned difficulties<br>2 = no difficulties marked in the table |        |        |                |                 |                 |

Sum of scores (Questions B1-B8) = Raw score section B \_\_\_\_\_  
Raw score/ 18 \* 100 = \_\_\_\_\_ (Section B)

In sections 3 and 4 you will be asked to answer questions regarding your child's linguistic performance in reference to himself as well as other bilingual children.

### Section C: First Language Abilities (L1)

C1. How does your child express himself/herself in his/her first language?

|              |             |                  |                  |
|--------------|-------------|------------------|------------------|
| 0            | 1           | 2                | 3                |
| Single words | A few words | Simple sentences | Longer sentences |

C2. Compared to other children the same age, how do you think your child **expresses** him/herself in L1?

|                                   |                                      |                               |                                |
|-----------------------------------|--------------------------------------|-------------------------------|--------------------------------|
| 0                                 | 1                                    | 2                             | 3                              |
| Not as well as others his/her age | Almost as well as others his/her age | As well as others his/her age | Better than others his/her age |

C3. How easy is it for family members and friends to have spontaneous conversations with your child?

|                |                    |                               |           |
|----------------|--------------------|-------------------------------|-----------|
| 0              | 1                  | 2                             | 3         |
| Very difficult | Slightly difficult | As well as others his/her age | Very easy |

C4. Compared to other children the same age, do you think your child has difficulties making correct sentences?

|                        |                   |          |                 |
|------------------------|-------------------|----------|-----------------|
| 0                      | 1                 | 2        | 3               |
| Yes, many difficulties | Some difficulties | The same | No difficulties |

C5. Are you satisfied with your child's ability to comprehend in his/her first language?

|                      |               |           |                |
|----------------------|---------------|-----------|----------------|
| 0                    | 1             | 2         | 3              |
| Not at all satisfied | Not satisfied | Satisfied | Very satisfied |

C6. Are you satisfied with your child's ability to express in his/her first language?

|                      |               |           |                |
|----------------------|---------------|-----------|----------------|
| 0                    | 1             | 2         | 3              |
| Not at all satisfied | Not satisfied | Satisfied | Very satisfied |

C7. Does your child feel frustrated when he/she can't communicate in his/her first language?



|               |       |           |       |
|---------------|-------|-----------|-------|
| 0             | 1     | 2         | 3     |
| Almost always | Often | Sometimes | Never |

Sum of scores (Questions C1-C7) = Raw score section C \_\_\_\_\_

Raw score/ 21 \* 100 = \_\_\_\_\_ (Section C)

#### Section D: Second Language Abilities- Hebrew

D1. Do you think your child has difficulties learning his/her second language? Yes = 0 No = 3

D2. How does your child express himself/herself in Hebrew?

|              |             |                  |                  |
|--------------|-------------|------------------|------------------|
| 0            | 1           | 2                | 3                |
| Single words | A few words | Simple sentences | Longer sentences |

D3. Compared to other children the same age, how do you think your child **expresses** him/herself in Hebrew?

|                                          |                                      |                               |                                |
|------------------------------------------|--------------------------------------|-------------------------------|--------------------------------|
| 0                                        | 1                                    | 2                             | 3                              |
| Not at all as well as others his/her age | Almost as well as others his/her age | As well as others his/her age | Better than others his/her age |

D4. How easy is it for family members and friends to have spontaneous conversations in Hebrew with your child?

|                |                    |                               |           |
|----------------|--------------------|-------------------------------|-----------|
| 0              | 1                  | 2                             | 3         |
| Very difficult | Slightly difficult | As well as others his/her age | Very easy |

D5. Compared to other children the same age, do you think your child has difficulties making correct sentences in Hebrew?

|                        |                   |          |                 |
|------------------------|-------------------|----------|-----------------|
| 0                      | 1                 | 2        | 3               |
| Yes, many difficulties | Some difficulties | The same | No difficulties |

D6. Are you satisfied with your child's ability to comprehend in Hebrew?

|                      |               |           |                |
|----------------------|---------------|-----------|----------------|
| 0                    | 1             | 2         | 3              |
| Not at all satisfied | Not satisfied | Satisfied | Very satisfied |

D7. Are you satisfied with your child's ability to express him/herself in Hebrew?

|                      |               |           |                |
|----------------------|---------------|-----------|----------------|
| 0                    | 1             | 2         | 3              |
| Not at all satisfied | Not satisfied | Satisfied | Very satisfied |

D8. Does your child feel frustrated when he/she can't communicate in Hebrew?

|               |       |           |       |
|---------------|-------|-----------|-------|
| 0             | 1     | 2         | 3     |
| Almost always | Often | Sometimes | Never |

Sum of scores (Questions D1-D8) = Raw score section D \_\_\_\_\_

Raw score/ 24 \* 100 = \_\_\_\_\_ (Section D)

#### Total score

Raw score B + Raw score C + Raw score D = Total raw score

Total raw score/63 \* 100 = BiPAQ score
